# Supplementary material
Source: Copernicus journal article supplement (doi:10.5194/acp-26-6147-2026)
Supplement: Supplementary file 1 [file acp-26-6147-2026-supplement.pdf]

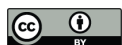

*Supplement of*

## **Investigating the role of ammonia in enhancing secondary organic aerosol formation from the co-photooxidation of anthropogenic and biogenic VOCs**

**Yongxin Yan et al.**

*Correspondence to:* Junling Li ([lijl@craes.org.cn](mailto:lijl@craes.org.cn)) and Hong Li ([lihong@craes.org.cn](mailto:lihong@craes.org.cn))

The copyright of individual parts of the supplement might differ from the article licence.

**Table S1.** Summary of the initial conditions and results of the conducted experiments.

| Number | Date     | $\alpha$ -pinene (ppb) | n-heptylcyclohexane (ppb) | NH <sub>3</sub> (ppb) | NO (ppb) | NO <sub>2</sub> (ppb) | NO <sub>x</sub> (ppb) | $\Delta$ VOC/NO <sub>x</sub> (ppbC ppb <sup>-1</sup> ) | JNO <sub>2</sub> ( $\times 10^{-3}$ s <sup>-1</sup> ) | T (°C) | RH (%) | O <sub>3</sub> (ppb) | Mass ( $\mu\text{g m}^{-3}$ ) |
|--------|----------|------------------------|---------------------------|-----------------------|----------|-----------------------|-----------------------|--------------------------------------------------------|-------------------------------------------------------|--------|--------|----------------------|-------------------------------|
| MIX-1  | 20231020 | 43.7                   | 30.4                      | --                    | 63.5     | 92.7                  | 156.2                 | 5.3                                                    | 4.4                                                   | 34.8   | --     | 121.6                | 3.5                           |
| MIX-2  | 20231022 | 63.9                   | 31.7                      | --                    | 57.7     | 84.7                  | 142.4                 | 7.4                                                    | 4.0                                                   | 38.5   | --     | 235.1                | 2.6                           |
| MIX-3  | 20231110 | 66.0                   | 39.1                      | --                    | 41.5     | 95.6                  | 137.1                 | 8.5                                                    | 4.0                                                   | 25.7   | 8.6    | 108.5                | 51.6                          |
| MIX-4  | 20231206 | 84.9                   | 87.3                      | --                    | 40.7     | 91.7                  | 132.4                 | 15.0                                                   | 2.1                                                   | 21.1   | 7.0    | 89.5                 | 20.4                          |
| MIX-N1 | 20231103 | 63.6                   | 38.9                      | 748.5                 | 48.6     | 94.5                  | 143.1                 | 8.0                                                    | 3.9                                                   | 34.0   | 12.2   | 136.9                | 140.7                         |
| MIX-N2 | 20231115 | 86.3                   | 84.8                      | 748.5                 | 41.4     | 94.9                  | 136.3                 | 14.4                                                   | 0.9                                                   | 14.4   | 14.4   | 52.9                 | 125.5                         |
| MIX-N3 | 20231231 | 86.7                   | 90.1                      | 748.5                 | 33.9     | 94.6                  | 128.5                 | 15.9                                                   | 3.1                                                   | 23.2   | 11.7   | 90.2                 | 187.4                         |
| MIX-N4 | 20240103 | 83.8                   | 81.7                      | 133.7                 | 37.5     | 80.1                  | 117.6                 | 16.2                                                   | 3.1                                                   | 26.0   | 8.7    | 98.6                 | 133.5                         |
| MIX-N5 | 20240116 | 78.3                   | 96.2                      | 74.85                 | 35.1     | 91.2                  | 126.3                 | 16.1                                                   | 2.1                                                   | 19.3   | 11.8   | 79.0                 | 165.0                         |
| AL-1   | 20231026 | --                     | 36.6                      | --                    | 59.0     | 96.1                  | 155.1                 | 3.1                                                    | 3.9                                                   | 40.7   | 6.4    | 32.2                 | 0.8                           |
| AL-2   | 20231204 | --                     | 88.6                      | --                    | 42.6     | 80.5                  | 123.1                 | 9.4                                                    | 2.2                                                   | 17.1   | 9.3    | 7.8                  | 5.6                           |
| AL-N1  | 20231028 | --                     | 57.3                      | 748.5                 | 61.2     | 95.8                  | 157.0                 | 4.7                                                    | 2.7                                                   | 36.4   | 6.4    | 13.2                 | 17.5                          |
| AL-N2  | 20231113 | --                     | 34.5                      | 748.5                 | 42.6     | 95.4                  | 138.0                 | 3.3                                                    | 3.5                                                   | 24.3   | 14.0   | 10.9                 | 98.2                          |
| AL-N3  | 20240108 | --                     | 93.4                      | 74.85                 | 36.4     | 80.7                  | 117.1                 | 10.4                                                   | 2.0                                                   | 19.0   | 9.9    | 10.1                 | 58.2                          |
| AL-N4  | 20240131 | --                     | 69.5                      | 214                   | 26.6     | 63.3                  | 89.9                  | 10.1                                                   | 2.4                                                   | 16.3   | 12.3   | 17.4                 | 52.6                          |
| AP-1   | 20231024 | 62.0                   | --                        | --                    | 58.1     | 80.8                  | 138.9                 | 4.5                                                    | 3.4                                                   | 39.0   | --     | 202.1                | 4.5                           |
| AP-2   | 20231201 | 69.9                   | --                        | --                    | 44.9     | 78.7                  | 123.6                 | 5.7                                                    | 3.3                                                   | 24.1   | 8.8    | 85.1                 | 16.6                          |
| AP-N1  | 20231101 | 65.6                   | --                        | 748.5                 | 48.3     | 91.3                  | 139.6                 | 4.7                                                    | 3.1                                                   | 36.5   | 12.8   | 147.9                | 93.4                          |
| AP-N2  | 20231128 | 81.2                   | --                        | 748.5                 | 43.1     | 85.0                  | 128.1                 | 6.3                                                    | 3.4                                                   | 22.4   | 10.2   | 69.4                 | 173.4                         |

|       |          |      |    |       |      |      |       |     |     |      |      |      |       |
|-------|----------|------|----|-------|------|------|-------|-----|-----|------|------|------|-------|
| AP-N3 | 20240112 | 79.8 | -- | 74.85 | 40.8 | 89.5 | 130.3 | 6.1 | 1.9 | 21.2 | 13.9 | 71.5 | 172.7 |
| AP-N4 | 20240126 | 49.5 | -- | 74.85 | 49.9 | 76.3 | 126.2 | 3.9 | 3.3 | 25.2 | 11.3 | 83.6 | 122.1 |
| AP-N5 | 20240129 | 57.6 | -- | 214   | 48.1 | 71.7 | 119.8 | 4.8 | 1.5 | 19.9 | 13.5 | 48.3 | 90.9  |

The mass here was the measured value with the SMPS; the density of the formed SOA derived from n-heptylcyclohexane was assumed to be 1.1 g cm<sup>-3</sup>; the density of the formed SOA derived from  $\alpha$ -pinene was assumed to be 1.4 g cm<sup>-3</sup>; the density of the formed SOA derived from the mixed VOCs was assumed to be 1.25 g cm<sup>-3</sup>.

**Table S2.** Total count of detected compounds detected across all SOA samples in positive (+) and negative (-) ionization mode, the signal relative intensity of which were greater than 0.05. A relative intensity of 1 was assigned to the most intense peak that was non-impurity in each sample group.

| Mode         | Phase  | Total count of detected compounds |     |
|--------------|--------|-----------------------------------|-----|
| Positive (+) | Former | 343                               | 414 |
|              | Latter | 305                               | 573 |
| Negative (-) | Former | 149                               | 182 |
|              | Latter | 168                               |     |

**Table S3.** Identified molecular formulas and DBE of SOA in nitrate-containing experiments.

| m/z    | Molecular formula                                            | Latter (+) |      |      | Former (+) |      |      | Latter (-) |      |      | Former (-) |      |      | DBE |
|--------|--------------------------------------------------------------|------------|------|------|------------|------|------|------------|------|------|------------|------|------|-----|
|        |                                                              | MIX-N      | AL-N | AP-N |     |
| 113.06 | C <sub>6</sub> H <sub>10</sub> O <sub>2</sub>                |            |      |      |            |      |      | √          | √    | √    | √          | √    | √    | 2   |
| 129.05 | C <sub>6</sub> H <sub>8</sub> O <sub>3</sub>                 | √          | √    | √    | √          | √    | √    |            | √    |      |            | √    |      | 3   |
| 141.09 | C <sub>8</sub> H <sub>14</sub> O <sub>2</sub>                |            |      |      |            |      |      | √          | √    | √    | √          | √    | √    | 2   |
| 141.10 | C <sub>7</sub> H <sub>14</sub> N <sub>2</sub> O              |            |      |      |            |      |      | √          | √    | √    | √          | √    |      | 2   |
| 143.11 | C <sub>7</sub> H <sub>16</sub> N <sub>2</sub> O              |            |      |      |            |      |      | √          | √    |      | √          | √    | √    | 1   |
| 151.11 | C <sub>10</sub> H <sub>14</sub> O                            | √          |      | √    | √          |      | √    |            |      |      |            |      |      | 4   |
| 153.09 | C <sub>9</sub> H <sub>12</sub> O <sub>2</sub>                | √          | √    | √    | √          | √    | √    |            |      |      |            |      |      | 4   |
| 157.05 | C <sub>7</sub> H <sub>8</sub> O <sub>4</sub>                 |            |      |      |            |      |      | √          | √    | √    | √          | √    | √    | 4   |
| 157.06 | C <sub>6</sub> H <sub>8</sub> N <sub>2</sub> O <sub>3</sub>  |            |      |      |            |      |      | √          | √    | √    | √          | √    | √    | 4   |
| 157.12 | C <sub>9</sub> H <sub>18</sub> O <sub>2</sub>                |            |      |      |            |      |      | √          | √    | √    | √          | √    | √    | 1   |
| 157.13 | C <sub>8</sub> H <sub>18</sub> N <sub>2</sub> O              |            |      |      |            |      |      | √          | √    | √    | √          | √    | √    | 1   |
| 167.11 | C <sub>7</sub> H <sub>16</sub> N <sub>2</sub> O              | √          | √    | √    | √          |      | √    |            |      |      |            |      |      | 1   |
| 169.08 | C <sub>7</sub> H <sub>14</sub> O <sub>3</sub>                |            |      |      |            |      |      | √          |      | √    | √          |      | √    | 1   |
| 169.09 | C <sub>6</sub> H <sub>14</sub> N <sub>2</sub> O <sub>2</sub> |            | √    | √    |            | √    | √    | √          | √    | √    | √          | √    | √    | 1   |
| 169.12 | C <sub>10</sub> H <sub>18</sub> O <sub>2</sub>               |            |      |      |            |      |      | √          |      | √    | √          |      | √    | 2   |
| 171.06 | C <sub>6</sub> H <sub>12</sub> O <sub>4</sub>                |            |      |      |            |      |      | √          |      | √    | √          |      | √    | 1   |
| 171.07 | C <sub>5</sub> H <sub>12</sub> N <sub>2</sub> O <sub>3</sub> |            | √    | √    |            | √    | √    | √          | √    | √    | √          | √    | √    | 1   |
| 171.10 | C <sub>9</sub> H <sub>14</sub> O <sub>3</sub>                |            | √    | √    |            | √    | √    | √          | √    | √    | √          |      | √    | 3   |
| 173.08 | C <sub>8</sub> H <sub>12</sub> O <sub>4</sub>                | √          | √    |      | √          |      |      |            | √    |      |            |      |      | 3   |
| 174.11 | C <sub>8</sub> H <sub>15</sub> NO <sub>3</sub>               | √          | √    | √    |            | √    | √    |            |      |      |            |      |      | 2   |
| 179.07 | C <sub>8</sub> H <sub>12</sub> O <sub>3</sub>                | √          | √    | √    | √          | √    | √    |            |      |      |            |      |      | 3   |
| 183.09 | C <sub>8</sub> H <sub>16</sub> O <sub>3</sub>                |            |      |      |            |      |      | √          |      | √    | √          |      | √    | 1   |
| 183.10 | C <sub>10</sub> H <sub>14</sub> O <sub>3</sub>               |            | √    |      |            | √    |      | √          | √    | √    | √          | √    | √    | 4   |

|        |                                                               |   |   |   |   |   |   |   |   |   |   |   |   |   |
|--------|---------------------------------------------------------------|---|---|---|---|---|---|---|---|---|---|---|---|---|
| 183.11 | C <sub>7</sub> H <sub>16</sub> N <sub>2</sub> O <sub>2</sub>  | √ |   | √ |   |   | √ | √ | √ | √ | √ | √ | √ | 1 |
| 183.13 | C <sub>11</sub> H <sub>20</sub> O <sub>2</sub>                |   |   |   |   |   |   | √ |   | √ | √ |   | √ | 2 |
| 183.14 | C <sub>10</sub> H <sub>20</sub> N <sub>2</sub> O              |   |   |   |   |   |   | √ |   | √ | √ |   | √ | 2 |
| 184.13 | C <sub>10</sub> H <sub>19</sub> NO <sub>2</sub>               |   |   |   |   |   |   | √ |   | √ | √ |   | √ | 2 |
| 185.08 | C <sub>9</sub> H <sub>12</sub> O <sub>4</sub>                 |   | √ |   |   | √ |   | √ | √ | √ | √ |   | √ | 4 |
| 185.09 | C <sub>6</sub> H <sub>14</sub> N <sub>2</sub> O <sub>3</sub>  |   |   |   |   |   |   | √ | √ | √ | √ |   | √ | 1 |
| 185.11 | C <sub>10</sub> H <sub>18</sub> O <sub>3</sub>                |   |   |   |   |   |   | √ |   | √ | √ |   | √ | 2 |
| 185.12 | C <sub>9</sub> H <sub>16</sub> N <sub>2</sub> O <sub>2</sub>  | √ |   | √ | √ |   | √ | √ |   | √ | √ |   | √ | 3 |
| 187.10 | C <sub>8</sub> H <sub>16</sub> N <sub>2</sub> O <sub>3</sub>  |   |   |   |   |   |   | √ | √ | √ | √ | √ | √ | 2 |
| 199.10 | C <sub>7</sub> H <sub>16</sub> N <sub>2</sub> O <sub>3</sub>  |   | √ |   |   | √ |   | √ | √ | √ | √ |   | √ | 1 |
| 208.11 | C <sub>8</sub> H <sub>17</sub> NO <sub>5</sub>                | √ | √ | √ | √ | √ | √ |   |   |   |   |   |   | 1 |
| 209.09 | C <sub>8</sub> H <sub>14</sub> N <sub>2</sub> O <sub>3</sub>  | √ | √ | √ | √ | √ | √ |   |   |   |   |   |   | 3 |
| 211.18 | C <sub>12</sub> H <sub>22</sub> N <sub>2</sub> O              | √ | √ |   | √ | √ |   |   | √ |   |   | √ |   | 3 |
| 221.09 | C <sub>9</sub> H <sub>14</sub> N <sub>2</sub> O <sub>3</sub>  | √ | √ | √ | √ | √ | √ |   |   |   |   |   |   | 4 |
| 223.10 | C <sub>7</sub> H <sub>14</sub> N <sub>2</sub> O <sub>6</sub>  | √ | √ | √ | √ | √ | √ |   |   |   |   |   |   | 2 |
| 233.16 | C <sub>10</sub> H <sub>20</sub> N <sub>2</sub> O <sub>4</sub> | √ | √ | √ | √ | √ | √ |   |   |   |   |   |   | 2 |
| 235.18 | C <sub>14</sub> H <sub>22</sub> N <sub>2</sub> O              | √ | √ |   | √ | √ |   |   |   |   |   |   |   | 5 |
| 238.12 | C <sub>9</sub> H <sub>19</sub> NO <sub>6</sub>                |   |   |   | √ |   |   |   |   |   |   |   |   | 1 |
| 240.10 | C <sub>8</sub> H <sub>17</sub> NO <sub>7</sub>                | √ | √ | √ | √ | √ | √ |   |   |   |   |   |   | 1 |
| 253.03 | C <sub>6</sub> H <sub>8</sub> N <sub>2</sub> O <sub>9</sub>   | √ |   |   | √ |   |   |   |   |   |   |   |   | 4 |
| 255.10 | C <sub>9</sub> H <sub>18</sub> O <sub>8</sub>                 | √ |   |   | √ |   |   |   |   |   |   |   |   | 1 |
| 255.24 | C <sub>15</sub> H <sub>32</sub> N <sub>2</sub> O              |   |   |   |   |   |   | √ | √ | √ | √ | √ | √ | 1 |
| 267.04 | C <sub>5</sub> H <sub>12</sub> N <sub>2</sub> O <sub>9</sub>  | √ |   | √ | √ | √ |   |   |   |   |   |   |   | 1 |
| 280.17 | C <sub>12</sub> H <sub>25</sub> NO <sub>6</sub>               | √ |   |   | √ |   |   |   |   |   |   |   |   | 1 |
| 281.06 | C <sub>8</sub> H <sub>12</sub> N <sub>2</sub> O <sub>9</sub>  | √ | √ |   | √ | √ |   |   |   |   |   |   |   | 4 |
| 283.10 | C <sub>10</sub> H <sub>18</sub> O <sub>9</sub>                | √ | √ | √ | √ | √ | √ |   |   |   |   |   |   | 2 |
| 283.27 | C <sub>17</sub> H <sub>36</sub> N <sub>2</sub> O              |   |   |   |   |   |   | √ | √ |   | √ | √ |   | 1 |

|        |                                                               |   |  |   |   |  |   |   |  |   |   |  |   |   |
|--------|---------------------------------------------------------------|---|--|---|---|--|---|---|--|---|---|--|---|---|
| 333.22 | C <sub>17</sub> H <sub>32</sub> O <sub>6</sub>                | √ |  | √ | √ |  | √ |   |  |   |   |  |   | 2 |
| 345.22 | C <sub>18</sub> H <sub>32</sub> O <sub>6</sub>                | √ |  | √ | √ |  | √ |   |  |   |   |  |   | 3 |
| 358.22 | C <sub>18</sub> H <sub>31</sub> NO <sub>6</sub>               | √ |  |   | √ |  | √ |   |  |   |   |  |   | 4 |
| 359.04 | C <sub>8</sub> H <sub>16</sub> O <sub>14</sub>                | √ |  |   | √ |  |   |   |  |   |   |  |   | 1 |
| 363.20 | C <sub>17</sub> H <sub>30</sub> O <sub>8</sub>                | √ |  | √ | √ |  | √ |   |  |   |   |  |   | 3 |
| 364.23 | C <sub>17</sub> H <sub>35</sub> NO <sub>7</sub>               |   |  |   |   |  |   | √ |  |   | √ |  | √ | 1 |
| 367.23 | C <sub>17</sub> H <sub>36</sub> O <sub>8</sub>                |   |  |   |   |  |   | √ |  | √ | √ |  | √ | 0 |
| 367.24 | C <sub>19</sub> H <sub>36</sub> O <sub>5</sub>                |   |  |   |   |  |   | √ |  | √ | √ |  | √ | 2 |
| 372.23 | C <sub>19</sub> H <sub>33</sub> NO <sub>6</sub>               | √ |  |   | √ |  | √ |   |  |   |   |  |   | 4 |
| 373.06 | C <sub>11</sub> H <sub>16</sub> O <sub>14</sub>               | √ |  |   | √ |  |   |   |  |   |   |  |   | 4 |
| 373.23 | C <sub>16</sub> H <sub>34</sub> N <sub>2</sub> O <sub>6</sub> | √ |  |   | √ |  |   |   |  |   |   |  |   | 1 |
| 376.23 | C <sub>18</sub> H <sub>33</sub> NO <sub>7</sub>               | √ |  |   | √ |  | √ |   |  |   |   |  |   | 3 |
| 377.21 | C <sub>18</sub> H <sub>32</sub> O <sub>8</sub>                | √ |  | √ | √ |  | √ |   |  |   |   |  |   | 3 |
| 388.23 | C <sub>17</sub> H <sub>35</sub> NO <sub>7</sub>               | √ |  | √ | √ |  | √ |   |  |   |   |  |   | 1 |
| 389.21 | C <sub>17</sub> H <sub>34</sub> O <sub>8</sub>                |   |  |   |   |  |   | √ |  | √ | √ |  | √ | 1 |
| 390.24 | C <sub>19</sub> H <sub>35</sub> NO <sub>7</sub>               | √ |  | √ |   |  | √ |   |  |   |   |  |   | 3 |
| 401.26 | C <sub>20</sub> H <sub>36</sub> N <sub>2</sub> O <sub>6</sub> | √ |  |   | √ |  | √ |   |  |   |   |  |   | 4 |
| 413.21 | C <sub>19</sub> H <sub>34</sub> O <sub>8</sub>                | √ |  | √ | √ |  | √ |   |  |   |   |  |   | 3 |
| 522.40 | C <sub>27</sub> H <sub>55</sub> NO <sub>8</sub>               | √ |  |   | √ |  |   |   |  |   |   |  |   | 1 |
| 525.36 | C <sub>26</sub> H <sub>52</sub> O <sub>10</sub>               | √ |  |   | √ |  | √ |   |  |   |   |  |   | 1 |

The DBE here was the abbreviation of ring and double-bond equivalent. "√" signified the detection of the substance in the respective experiment.

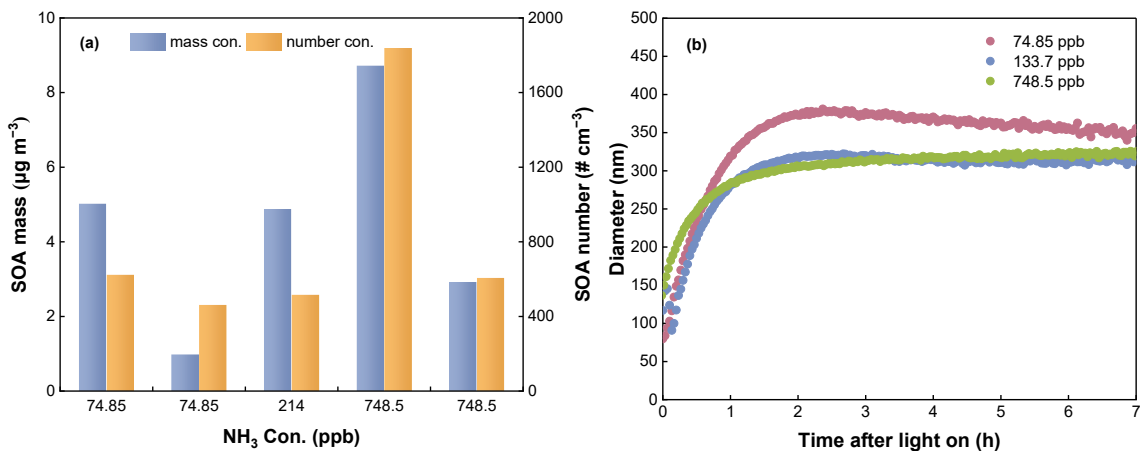

**Figure S1.** (a) Number and mass concentration of particulate matter formed by photochemical reaction of  $\text{NH}_3+\text{NO}_x$ . (b) The particle size distribution at varying  $\text{NH}_3$  concentration.

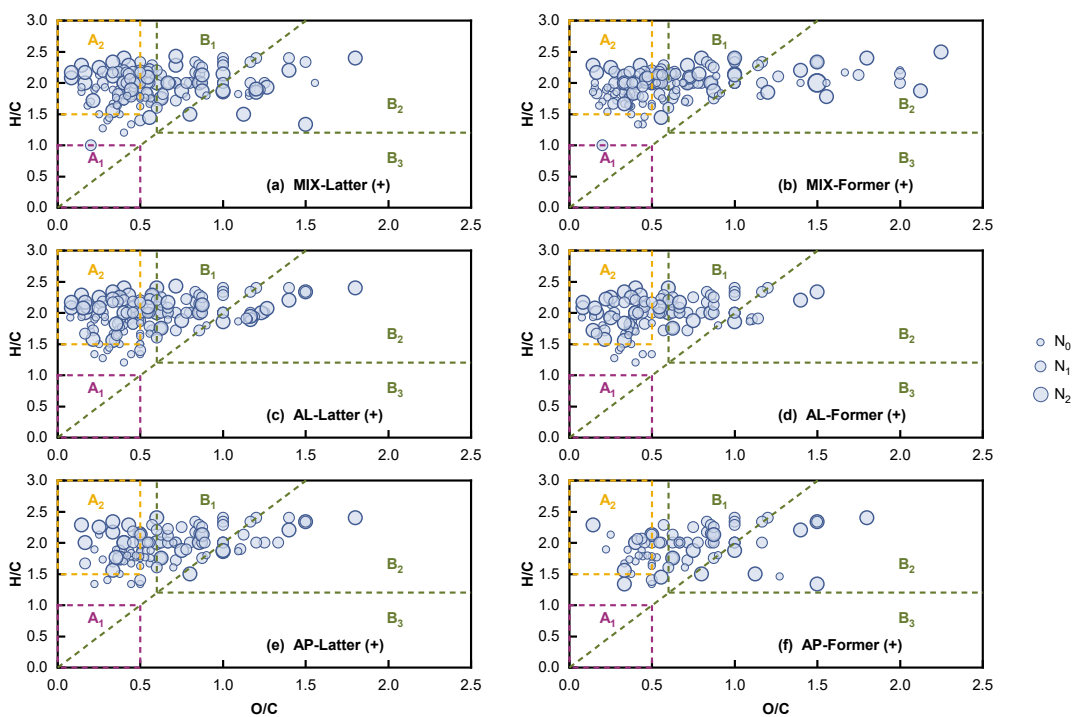

**Figure S2.** Van Krevelen diagram of compounds detected in the MIX experiment, AL experiment and AP experiment under positive mode.

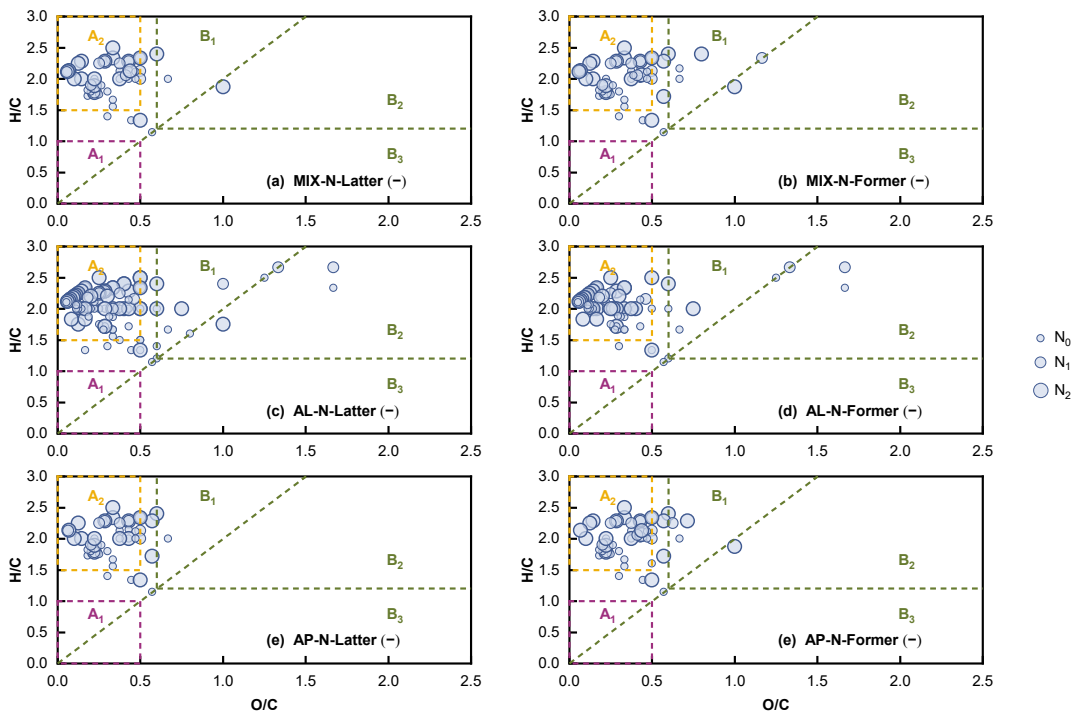

**Figure S3.** Van Krevelen diagram of compounds detected in the MIX-N experiment, AL-N experiment and AP-N experiment under negative mode.

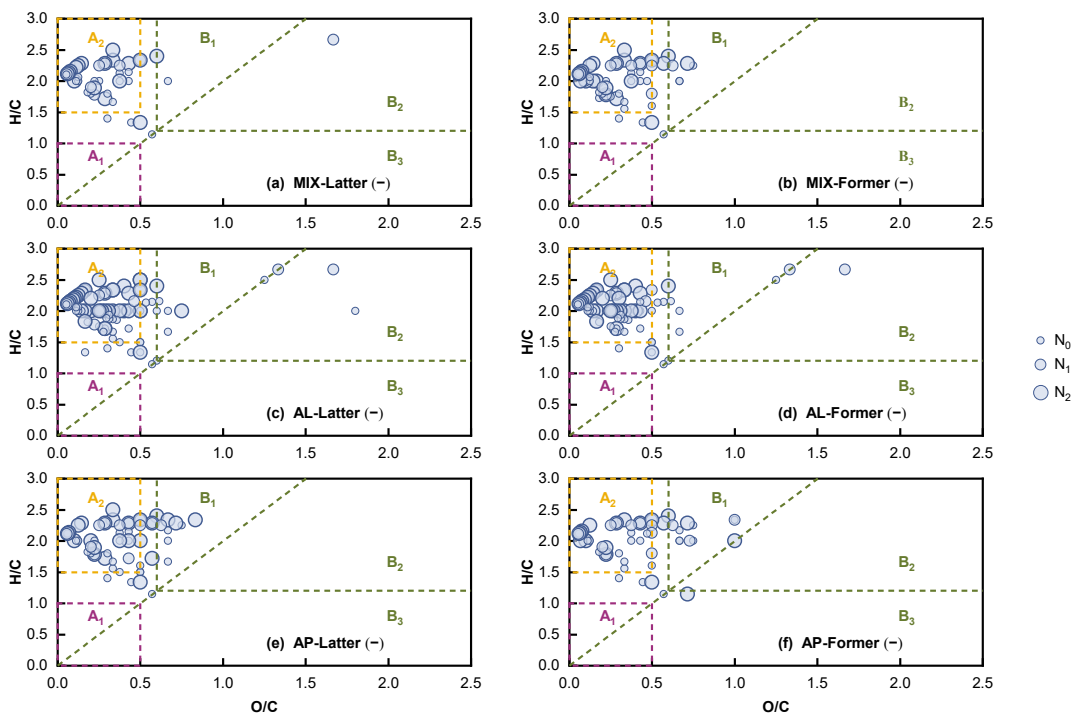

**Figure S4.** Van Krevelen diagram of compounds detected in the MIX experiment, AL experiment and AP experiment under negative mode.

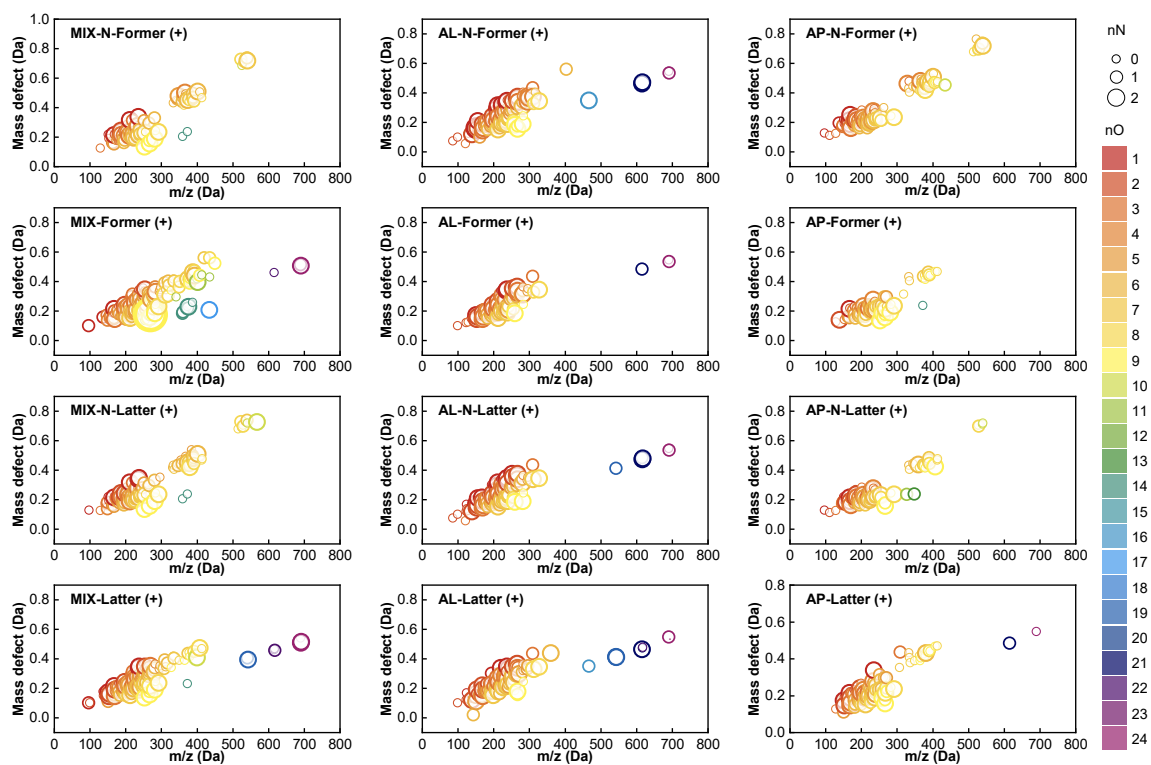

**Figure S5.** Mass defect vs mass to charge ratio of multifunctional organic compounds in secondary organic aerosols derived from single / mixed experiments of n-heptylcyclohexane and  $\alpha$ -pinene under positive and negative mode (Each circle denotes a unique oxidative molecule, colored based on its oxygen content, with the circle's size reflecting the molecule's nitrogen count).

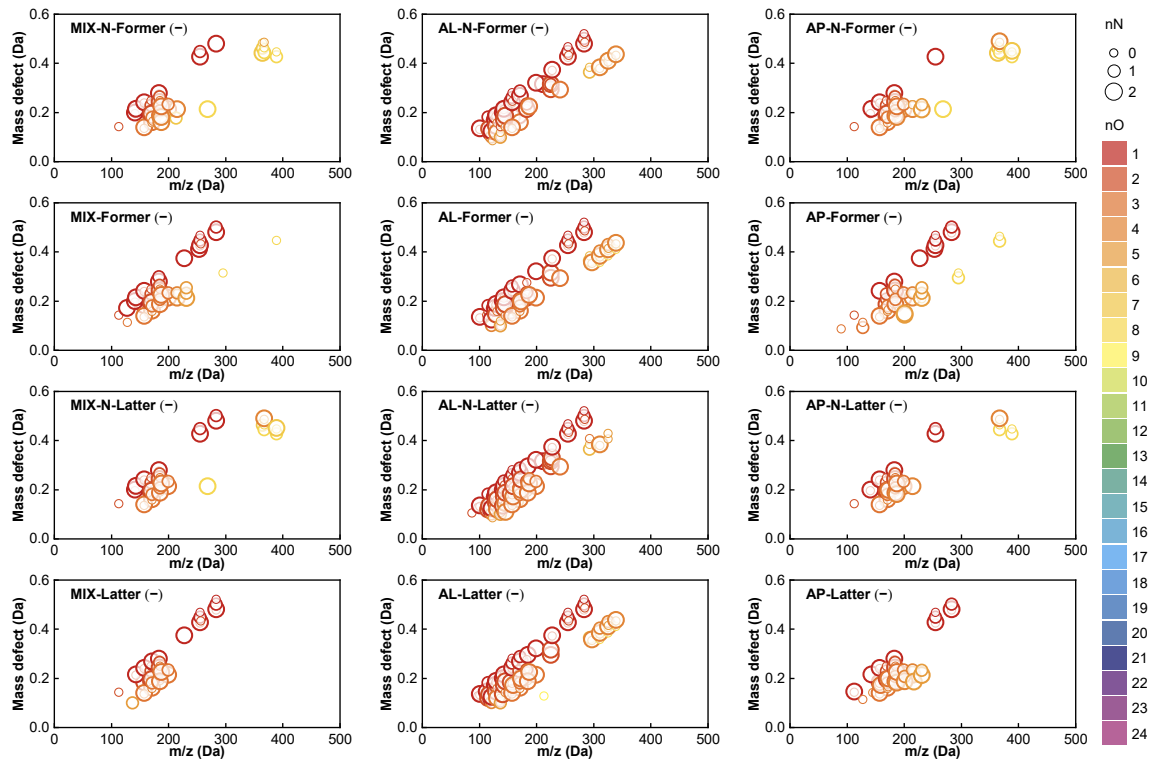

**Figure S6.** Mass defect vs mass to charge ratio of multifunctional organic compounds in secondary organic aerosols derived from single / mixed experiments of n-heptylcyclohexane and  $\alpha$ -pinene under positive and negative mode (Each circle denotes a unique oxidative molecule, colored based on its oxygen content, with the circle's size reflecting the molecule's nitrogen count).
